# Supplementary material for: Methodologies for the Sustainability Assessment of Agricultural Production Systems, with a Focus on Rice: A Review
Source: MDPI journal article supplement (doi:10.3390/su131911123), 2021-10-08
Supplement: s1 [file s1]

Archive with 1 entries (1 files):
- sustainability-1292589-supplementary.pdf
